# Supplementary material
Source: PubMed Central journal article supplement (PMC5722686)
Supplement: NIHMS915125-supplement-1.pdf [file NIHMS915125-supplement-1.pdf]

## m<sup>1</sup>A-MAP protocol

### 1. m<sup>1</sup>A immunoprecipitation

- Adjust the volume of 40 µg polyA<sup>+</sup> RNA to 72 µL with RNase free water. Add 8 µL RNA Fragmentation Buffer (10×) and mix well by pipetting up and down. Incubate in a preheated thermal cycler for 5 minutes at 94 °C and then chill on ice immediately.
- Add 8 µL 10× RNA Fragmentation Stop Solution to the mixture and fragmented RNA is purified by ethanol precipitation. Dissolve the RNA pellets with 105 µL RNase free water completely.
- Save 5 µL of fragmented RNA as input sample. Subject the remaining 100 µL of fragmented RNA to m<sup>1</sup>A immunoprecipitation.
- Add 40 µL 10× IPP buffer (1.5 M NaCl, 1% NP-40, 100 mM Tris, pH 7.4), 10 µL RiboLock RNase Inhibitor (40 U/µL), 5 µg anti-m<sup>1</sup>A antibody to the 100 µL fragmented RNA and adjust the volume to 400 µL with RNase free water. Rotate at 4 °C overnight.
- Resuspend 40 µL Protein A/G UltraLink Resin into 400 µL 1× IPP buffer (150 mM NaCl, 0.1% NP-40, 10 mM Tris, pH 7.4) and then add to the RNA antibody mixture followed by rotating at 4 °C for additional 3 h.
- Resins are washed with twice with 1 mL IPP buffer, once with 1 mL low salt buffer (75 mM NaCl, 0.1% NP-40, 10 mM Tris, pH 7.4), once with 1 mL high salt buffer (200 mM NaCl, 0.1% NP-40, 10 mM Tris, pH 7.4) and twice with 1 mL TEN buffer (10 mM Tris, pH 7.4, 1 mM EDTA, pH 8.0, 0.05% NP-40).
- Add 200 µL of 3 mg/mL N<sup>1</sup>-methyladenosine in IPP buffer and rotate at room temperature for 1 h to elute the m<sup>1</sup>A containing RNA from resins. Repeat this step once and combine the supernatants together as immunoprecipitated sample and further purify the immunoprecipitated RNA by phenol-chloroform isolation.
- Dissolve the RNA pellets with 30 µL RNase free water completely. Save 10 µL of immunoprecipitated RNA as (-) demethylase sample and subject the remaining 20 µL of immunoprecipitated RNA to demethylase treatment.

### 2. Demethylase treatment

- Heat 20 µL of immunoprecipitated RNA at 65°C for 5 min and then chill on ice immediately to disrupt the RNA secondary structure. .
- Prepare the demethylation mix as follow:

| Reagents                                                                                        | Volume (µL) |
|-------------------------------------------------------------------------------------------------|-------------|
| 0.5 M MES, pH 6.5                                                                               | 4           |
| 28.3 mM of (NH <sub>4</sub> ) <sub>2</sub> Fe(SO <sub>4</sub> ) <sub>2</sub> ·6H <sub>2</sub> O | 0.4         |
| 30 mM 2-ketoglutarate                                                                           | 0.4         |
| 200 mM L-ascorbic acid                                                                          | 0.4         |
| RNase inhibitor (40 U/µL)                                                                       | 0.4         |
| 1 µM AlkB                                                                                       | 0.4         |
| RNase free water                                                                                | 14          |
| Total                                                                                           | 40          |

Mix the demethylation mix well by pipetting.

- Add the demethylation mix into denatured RNA and incubate at 37 °C for 2 h.
- Quench the demethylation reaction by the addition of 4 µL 50 mM EDTA and purify the

demethylated RNA by phenol-chloroform isolation.

e. Dissolve the RNA pellets with 10  $\mu$ L RNase free water completely [as (+) demethylase sample].

### 3. Library construction

Input sample, (-) demethylase sample and (+) demethylase sample are subjected to library construction.

#### a. PNK treatment

| Reagents                        | Volume ( $\mu$ L) |
|---------------------------------|-------------------|
| 10 $\times$ PNK buffer          | 2                 |
| T4 PNK (NEB)                    | 1                 |
| RNase inhibitor (40 U/ $\mu$ L) | 1                 |
| RNA                             | 10                |
| RNase free water                | 6                 |
| Total                           | 20                |

Mix well and incubate at 37  $^{\circ}$ C for 1 h and then heat-inactivate of PNK at 65  $^{\circ}$ C for 20 min.

Dephosphorylated RNAs are purified by ethanol precipitation and the RNA pellets are dissolved in 7  $\mu$ L RNase free water completely.

#### b. 3' RNA linker ligation

Add 1  $\mu$ L 20  $\mu$ M 3' RNA linker (5'rAPP-AGATCGGAAGAGCGTCGTG-3SpC3) into 7  $\mu$ L RNA sample, and mix well. Heat at 70 $^{\circ}$ C for 2 min and then chill on ice immediately.

Prepare the ligation mix as follow:

| Reagents                           | Volume ( $\mu$ L) |
|------------------------------------|-------------------|
| 10 $\times$ RNA ligation buffer    | 2                 |
| 0.1M DTT                           | 2                 |
| 50% PEG8000                        | 6                 |
| T4 RNA ligase2, truncated KQ (NEB) | 1                 |
| RNase inhibitor (40 U/ $\mu$ L)    | 1                 |
| Total                              | 12                |

Add the ligation mix into the RNA mix and mix well.

Incubate at 25  $^{\circ}$ C for 2 h.

Add 1  $\mu$ L 5' Deadenylase into the ligation mix followed by incubating at 30  $^{\circ}$ C for 1 h and then add 1  $\mu$ L RecJf followed by incubating at 37  $^{\circ}$ C for another 1 h to remove excess 3' RNA linker. These enzymes are then heat-inactivated at 70  $^{\circ}$ C for 20 min. RNAs are purified by ethanol precipitation and dissolved in 11  $\mu$ L RNase free water.

#### c. Reverse transcription

Add 1  $\mu$ L 2  $\mu$ M RT primer (ACACGACGCTCTTCCGATCT) into 10  $\mu$ L RNA sample, and mix well. Heat at 80 $^{\circ}$ C for 2 min and then chill on ice immediately.

Prepare the reverse transcription mix as follow:

| Reagents                                                                    | Volume ( $\mu$ L) |
|-----------------------------------------------------------------------------|-------------------|
| 10 $\times$ reverse transcription buffer (500 mM Tris, pH 8.3, 750 mM KCl,) | 2                 |

|                           |   |
|---------------------------|---|
| 30 mM MgCl <sub>2</sub>   | 2 |
| 10 mM dNTP mix            | 2 |
| 0.1M DTT                  | 1 |
| TGIRT                     | 1 |
| RNase inhibitor (40 U/μL) | 1 |
| Total                     | 9 |

Add the reverse transcription mix into RNA and mix well.

Incubate at 57 °C for 2 h.

Add 1 μL Exonuclease I (NEB) and incubate at 37 °C for 30 min to digest excess RT primers.

The cDNAs are purified using silane beads.

#### d. 5' adaptor ligation

Add 0.8 μL 80 μM 5' adaptor (5Phos-NNNNNNNNNAGATCGGAAGAGCACACGTCTG-3SpC3) and 1 μL DMSO into 5 μL cDNA sample, and mix well. Heat at 75°C for 2 min and then chill on ice immediately.

Prepare the ligation mix as follow:

| Reagents                                  | Volume (μL) |
|-------------------------------------------|-------------|
| 10x RNA ligation buffer                   | 2           |
| 0.1M ATP                                  | 0.2         |
| 50% PEG8000                               | 9           |
| T4 RNA ligase 1, high concentration (NEB) | 1.5         |
| H <sub>2</sub> O                          | 1.1         |
| Total                                     | 13.8        |

Add the ligation mix into cDNA and mix well.

Incubate at 25 °C overnight. The cDNAs are purified using silane beads.

#### e. PCR amplification

Prepare PCR mix as follow:

| Reagents                              | Volume (μL) |
|---------------------------------------|-------------|
| High-Fidelity 2X PCR Master Mix (NEB) | 25          |
| Universal primer (NEB)                | 1           |
| Index primer (NEB)                    | 1           |
| cDNA                                  | 23          |
| Total                                 | 50          |

Mix well and run the PCR amplification as follow:

| Temperature | Time  | Cycle |
|-------------|-------|-------|
| 98 °C       | 30 s  | 1     |
| 98 °C       | 10 s  | 12-15 |
| 65 °C       | 30 s  |       |
| 72 °C       | 30 s  |       |
| 72 °C       | 5 min | 1     |
| 4 °C        | Hold  |       |

PCR products are purified by 1.8x XP beads (Beckman) and then run on the 8% TBE gel. The

DNA bands according to 160-300 bp are excised. The gels are crushed to small pieces and DNAs are eluted from gel slices at 37 °C for 4h in 400 µL 1×TE buffer. DNAs are purified by ethanol precipitation and subjected to high throughput sequencing on Illumina Hiseq X10 with paired-end 2×150 bp read length.
